# Supplementary material for: Enhanced decomposition of sulfur trioxide in the water-splitting iodine–sulfur process via a catalytic membrane reactor
Source: Royal Society of Chemistry journal article supplement (doi:10.1039/c6ta06484a), 2016-01-01
Supplement: c6ta06484a1.pdf [file c6ta06484a1.pdf]

Supplementary information for

# Enhanced Decomposition of Sulfur Trioxide in the Water-Splitting Iodine-Sulfur Process via a Catalytic Membrane Reactor

Lie Meng, Masakoto Kanezashi, Xin Yu, and Toshinori Tsuru\*

*Department of Chemical Engineering, Graduate School of Engineering, Hiroshima University,  
Higashi-Hiroshima 739-8527, Japan  
E-mail: [tsuru@hiroshima-u.ac.jp](mailto:tsuru@hiroshima-u.ac.jp)*

---

## Table of Contents

---

|                                                                       |         |
|-----------------------------------------------------------------------|---------|
| Experimental                                                          | Page S2 |
| Fabrication of microporous silica membranes                           | Page S2 |
| Gas permeation measurement                                            | Page S2 |
| Figure S1                                                             | Page S2 |
| Figure S2                                                             | Page S3 |
| Estimation of the effective molecular size of SO <sub>3</sub> via NKP | Page S4 |
| Table S1                                                              | Page S4 |
| SO <sub>3</sub> decomposition in the catalytic membrane reactor       | Page S4 |
| References                                                            | Page S5 |

---

# Experimental

## ***Fabrication of microporous silica membranes***

Porous SiO<sub>2</sub> glass tubular substrates with a pore diameter of 500 nm, an outside diameter of 8.5 mm and a length of 100 mm were employed as supports. Tetraethoxysilane (TEOS) was used as a silica precursor and was mixed with ethanol, followed by the addition of water and HCl to obtain a silica sol. The molar ratio of the above reagents (TEOS/H<sub>2</sub>O/HCl) was controlled at 1/200/0.1, and the concentration of TEOS was kept at 0.05-1.0 wt%. The silica sol was deposited onto the porous substrates which were then calcined at 600 °C to form a thermally stable intermediate layer. For the separation top layer, the silica sol was coated onto the intermediate layer, followed by a calcination at 350 °C in air.

## ***Gas permeation measurement***

Single gas (He, H<sub>2</sub>, N<sub>2</sub>, CF<sub>4</sub> and SF<sub>6</sub>) permeation testing was conducted using a setup schematically shown in Figure S1. The feed gas was introduced to the upstream of the membrane under a temperature that varied between 300 and 600 °C. The pressure at the retentate side was controlled with a pressure regulator while the permeate side was maintained at atmospheric pressure. The gas flow rates were obtained by film flow meters (SF-2U, Horiba, Japan).

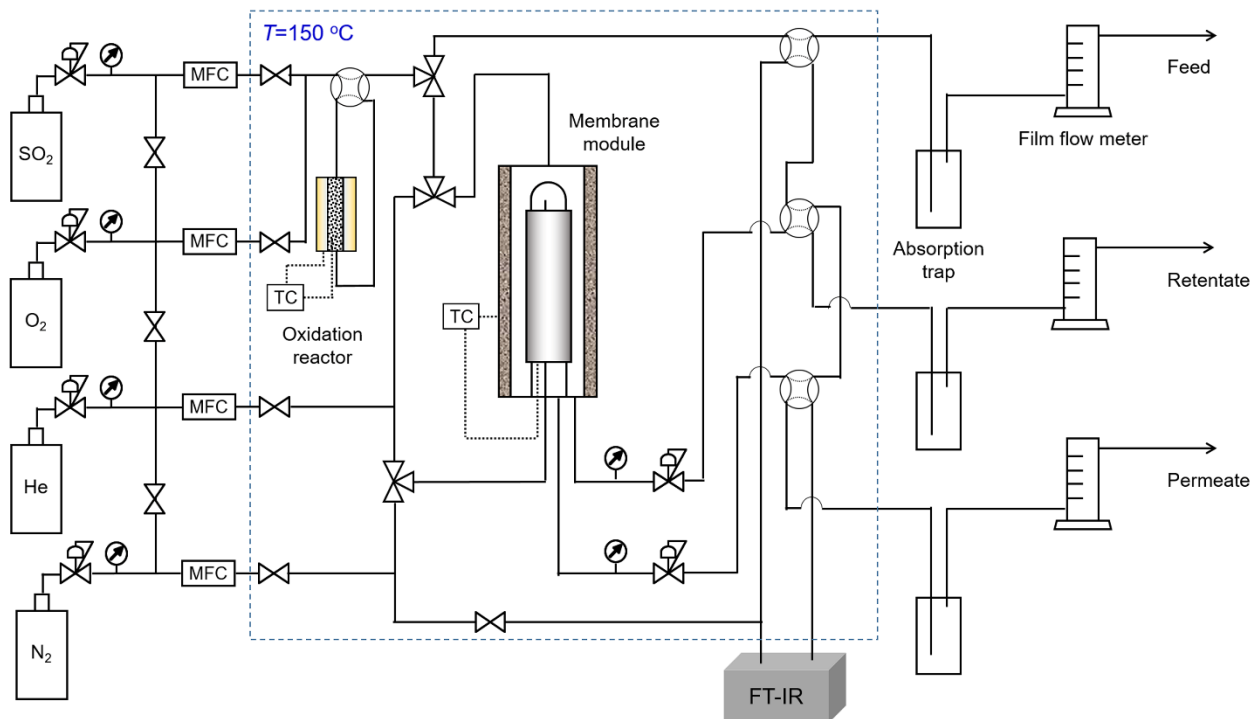

Figure S1. Schematic diagram of the experimental setup for gas permeation and catalytic membrane reactor.

In the present study, SO<sub>3</sub> was generated from the oxidation of SO<sub>2</sub> at 400 °C with Pt/Al<sub>2</sub>O<sub>3</sub> catalysts. The concentrations of SO<sub>3</sub> and SO<sub>2</sub> in mixed gas were determined using a Fourier transform infrared (FT-IR) analyzer (IRTracer-100, Shimadzu, Japan). Figure S2 shows the time-course of FT-IR analysis for O<sub>2</sub>/SO<sub>3</sub> separation with a microporous silica membrane at 600 °C. First, SO<sub>2</sub> was detected when SO<sub>2</sub> and O<sub>2</sub> were mixed and introduced into the FT-IR analyzer. After feeding SO<sub>2</sub> and O<sub>2</sub> into the oxidation reactor, the peak height for SO<sub>3</sub> increased while that for SO<sub>2</sub> decreased to zero indicating that the SO<sub>2</sub> conversion reached 100%. The stable SO<sub>3</sub> flow was then introduced into the shell side of the membrane. By switching the 4-way valves, the FT-IR analyzer could be connected to either the retentate or the permeate side which offered a quick-response and stable measurement of SO<sub>3</sub> concentration in O<sub>2</sub>/SO<sub>3</sub> mixed gas. The absorption trap filled with hydrogen peroxide (0.1 mol/L) was employed for trapping SO<sub>3</sub> and SO<sub>2</sub>, while O<sub>2</sub> passed through the traps and was measured by a film flow meter.

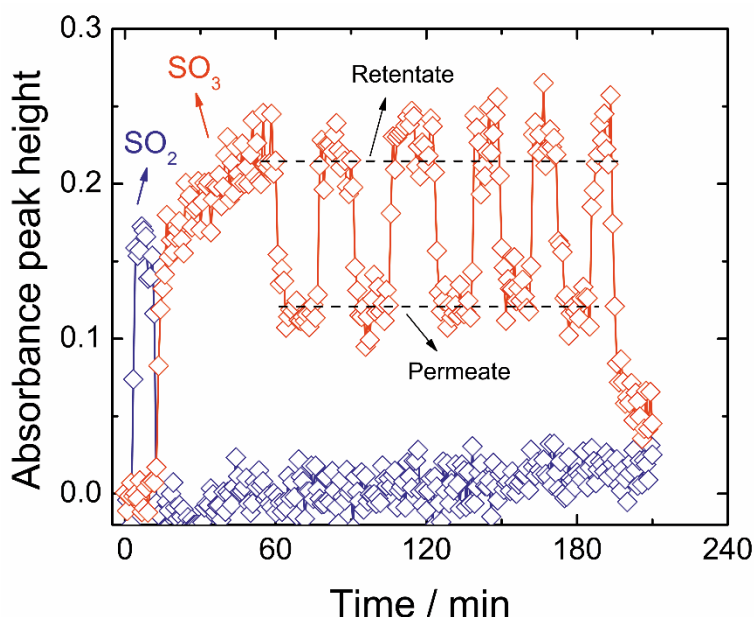

Figure S2. Time-course of FT-IR analysis for O<sub>2</sub>/SO<sub>3</sub> separation with a microporous silica membrane at 600 °C.

In binary-component gas permeation, the selective permeation causes a partial pressure distribution of the component along the membrane surface. Here, the logarithmic mean pressure difference for the component,  $i$  ( $\Delta p_{i,lm}$ ) was employed to calculate the driving force for gas permeation:

$$\Delta p_{i,lm} = \frac{\Delta p_{i,in} - \Delta p_{i,out}}{\ln\left(\frac{\Delta p_{i,in}}{\Delta p_{i,out}}\right)} \quad (1)$$

where  $\Delta p_{i,in}$  and  $\Delta p_{i,out}$  refer to the difference in the partial pressure of component  $i$  between the retentate and the permeate side at the inlet and at the outlet, respectively.

### Estimation of the effective molecular size of SO<sub>3</sub> via NKP

The normalized Knudsen-based permeance (NKP) method has been a useful tool for the determination of the average pore size of a microporous membrane,  $d_p$  [1-5]. NKP is the ratio of the permeance of component  $i$  to the permeance predicted using He, which is the smallest molecule, under the Knudsen diffusion mechanism, as expressed in Eq. (2).

$$NKP = \frac{P_i}{P_{He}} \frac{\sqrt{M_i}}{\sqrt{M_{He}}} = \frac{(d_p - d_{k,i})^3}{(d_p - d_{k,He})^3} \exp\left(-\frac{E_{p,i} - E_{p,He}}{RT}\right) \quad (2)$$

where  $P_i$ ,  $M_i$ ,  $E_{p,i}$ ,  $d_{k,i}$  represent the gas permeance, molecular weight, activation energy and molecular size for the permeating components, respectively. Herein, the  $E_{p,i}$  for different gases is assumed to be similar to  $E_{p,He}$  due to the large pore size of the microporous silica membrane [3]. Thus, the membrane pore size,  $d_p$ , can be calculated by the following equation (Eq. (3)).

$$NKP = \frac{(d_p - d_{k,i})^3}{(d_p - d_{k,He})^3} \quad (3)$$

Table S1 summarizes the gas physical and permeation properties used for NKP calculation. These gas permeation data for the microporous silica membrane were measured at 600 °C. Based on Eq. (3), the NKP fitting curve that is based on the experimentally obtained NKP with a best fitted pore size ( $d_p$ ) of 0.505 nm was plotted as a function of the molecular size of gas molecules. Then the effective molecular size of SO<sub>3</sub> permeates through the microporous membrane could be obtained by simply fitting the value of SO<sub>3</sub> permeance to the curve.

Table S1 Gas properties and NKP at 600 °C for the microporous silica membrane

| Gas             | Molecular size [nm] | Molecular weight [g mol <sup>-1</sup> ] | Permeance [10 <sup>-8</sup> mol m <sup>-2</sup> s <sup>-1</sup> Pa <sup>-1</sup> ] | NKP    |
|-----------------|---------------------|-----------------------------------------|------------------------------------------------------------------------------------|--------|
| He              | 0.260               | 4.00                                    | 247.34                                                                             | 1.0000 |
| O <sub>2</sub>  | 0.346               | 32.00                                   | 23.24                                                                              | 0.2657 |
| N <sub>2</sub>  | 0.364               | 28.02                                   | 13.15                                                                              | 0.1407 |
| SO <sub>2</sub> | 0.429               | 64.07                                   | 3.15                                                                               | 0.5098 |
| CF <sub>4</sub> | 0.480               | 88.00                                   | 0.81                                                                               | 0.1540 |
| SO <sub>3</sub> |                     | 80.07                                   | 0.94                                                                               |        |

### SO<sub>3</sub> decomposition in the catalytic membrane reactor

0.7 g Pt/Al<sub>2</sub>O<sub>3</sub> catalysts were packed into the core side of the membrane. The temperature inside the membrane was maintained at 600 °C, and the membrane module was placed in an oven controlled at 150 °C to avoid any possible condensation. The flow rate of SO<sub>3</sub>, O<sub>2</sub> in feed and O<sub>2</sub> as sweep gas in the permeate stream were 2.5, 43.6 and 8.8 ml/min, respectively. The pressure at the retentate side was controlled with a back-pressure regulator and pressurized from 130 to 140 kPa, while the permeate stream was kept at a

pressure of 108 kPa. SO<sub>3</sub> conversion ( $X$ ) in the catalytic membrane reactor is defined as the percentage of reacted SO<sub>3</sub>, and is expressed in the following equation:

$$X = \frac{F_{SO_3,0} - F_{SO_3,r} - F_{SO_3,p}}{F_{SO_3,0}} \quad (4)$$

where  $F_{SO_3,0}$ ,  $F_{SO_3,r}$ , and  $F_{SO_3,p}$  refer to the flow rates of SO<sub>3</sub> in the feed stream, at the outlet of retentate side and at the outlet of permeate side, respectively.

## References

1. H. R. Lee, M. Kanezashi, Y. Shimomura, T. Yoshioka, T. Tsuru, *AIChE J.*, 2011, **57**, 2755–2765.
2. H. Nagasawa, T. Niimi, M. Kanezashi, T. Yoshioka, T. Tsuru, *AIChE J.*, 2014, **60**, 4199–4210.
3. M. Kanezashi, M. Kawano, T. Yoshioka, T. Tsuru, *Ind. Eng. Chem. Res.*, 2012, **51**, 944–953.
4. L. Meng, M. Kanezashi, J. Wang, T. Tsuru, *J. Membr. Sci.*, 2015, **496**, 211–218.
5. M. Kanezashi, T. Matsutani, T. Wakihara, H. Tawarayama, H. Nagasawa, T. Yoshioka, T. Okubo, T. Tsuru, *ChemNanoMat*, 2016, **2**, 264–267.
